# Supplementary material
Source: ML conference proceedings conference paper supplement (https://openaccess.thecvf.com/content/CVPR2023/html/Zielonka_Instant_Volumetric_Head_CVPR_2023_paper.html)
Supplement: Supplementary file 2 [file Zielonka_Instant_Volumetric_Head_CVPR_2023_supplemental.zip]

Archive with 3 entries (2 files):
- CVPR_camera_ready/
- CVPR_camera_ready/5683-supp.pdf
- CVPR_camera_ready/5683-video.mp4
